1 **The impact of global and local Polynesian genetic ancestry on complex traits in**  
2 **Native Hawaiians**

3 Hanxiao Sun<sup>1,¶</sup>, Meng Lin<sup>1,¶</sup>, Emily M. Russell<sup>2</sup>, Ryan L. Minster<sup>2</sup>, Tsz Fung Chan<sup>1</sup>, Take  
4 Naseri<sup>3</sup>, Muagututi'a Sefuiva Reupena<sup>4</sup>, Annette Lum-Jones<sup>5</sup>, the Samoan Obesity,  
5 Lifestyle, and Genetic Adaptations (OLaGA) Study Group<sup>^</sup>, Iona Cheng<sup>6</sup>, Lynne R.  
6 Wilkens<sup>5</sup>, Loïc Le Marchand<sup>5</sup>, Christopher A. Haiman<sup>1</sup>, Charleston W. K. Chiang<sup>1,7,\*</sup>

7  
8 <sup>1</sup>Center for Genetic Epidemiology, Department of Preventive Medicine, Keck School of  
9 Medicine, University of Southern California, Los Angeles, CA

10 <sup>2</sup>Department of Human Genetics, Graduate School of Public Health, University of  
11 Pittsburgh, Pittsburgh, PA

12 <sup>3</sup>Ministry of Health, Government of Samoa, Apia, Samoa

13 <sup>4</sup>Lutia i Puava ae Mapu i Fagalele, Apia, Samoa

14 <sup>5</sup>Epidemiology Program, University of Hawai'i Cancer Center, University of Hawai'i,  
15 Manoa, Honolulu, HI

16 <sup>6</sup>Department of Epidemiology and Biostatistics, University of California San Francisco,  
17 San Francisco, CA

18 <sup>7</sup>Quantitative Computational Biology Section, Department of Biological Sciences,  
19 University of Southern California, Los Angeles, CA

20  
21 \* Corresponding author: [charleston.chiang@med.usc.edu](mailto:charleston.chiang@med.usc.edu)

22 ¶ These authors contributed equally.

23 ^ Full membership listed in Supporting Information

24 **Abstract**

25       Epidemiological studies of obesity, Type-2 diabetes (T2D), cardiovascular  
26 diseases and several common cancers have revealed an increased risk in Native  
27 Hawaiians compared to European- or Asian-Americans living in the Hawaiian islands.  
28 However, there remains a gap in our understanding of the genetic factors that affect the  
29 health of Native Hawaiians. To fill this gap, we studied the genetic risk factors at both the  
30 chromosomal and sub-chromosomal scales using genome-wide SNP array data on  
31 ~4,000 Native Hawaiians from the Multiethnic Cohort. We estimated the genomic  
32 proportion of Native Hawaiian ancestry (“global ancestry,” which we presumed to be  
33 Polynesian in origin), as well as this ancestral component along each chromosome (“local  
34 ancestry”) and tested their respective association with binary and quantitative  
35 cardiometabolic traits. After attempting to adjust for non-genetic covariates evaluated  
36 through questionnaires, we found that per 10% increase in global Polynesian genetic  
37 ancestry, there is a respective 8.6%, and 11.0% increase in the odds of being diabetic ( $P$   
38 =  $1.65 \times 10^{-4}$ ) and having heart failure ( $P = 2.18 \times 10^{-4}$ ), as well as a 0.059 s.d. increase in  
39 BMI ( $P = 1.04 \times 10^{-10}$ ). When testing the association of local Polynesian ancestry with risk  
40 of disease or biomarkers, we identified a chr6 region associated with T2D. This  
41 association was driven by a uniquely prevalent variant in Polynesian ancestry individuals.  
42 However, we could not replicate this finding in an independent Polynesian cohort from  
43 Samoa due to the small sample size of the replication cohort. In conclusion, we showed  
44 that Polynesian ancestry, which likely capture both genetic and lifestyle risk factors, is  
45 associated with an increased risk of obesity, Type-2 diabetes, and heart failure, and that

46 larger cohorts of Polynesian ancestry individuals will be needed to replicate the putative  
47 association on chr6 with T2D.

48

## 49 **Author Summary**

50 Native Hawaiians are one of the fastest growing ethnic minority in the U.S., and exhibit  
51 increased risk for metabolic and cardiovascular diseases. However, they are generally  
52 understudied, especially from a genetic perspective. To fill this gap, we studied the  
53 association of Polynesian genetic ancestry, at genomic and subgenomic scale, with  
54 quantitative and binary traits in self-identified Native Hawaiians. We showed that  
55 Polynesian ancestry, which likely capture both genetic and non-genetic risk factors  
56 related to Native Hawaiian people and culture are associated with increased risk for  
57 obesity, type-2 diabetes, and heart failure. While we do not endorse utilizing genetic  
58 information to supplant current standards of defining community membership through  
59 self-identity or genealogical records, our results suggest future studies could identify  
60 population-specific genetic susceptibility factors that may be useful in suggesting  
61 underlying biological mechanisms and reducing the disparity in disease interventions in  
62 Polynesian populations.

63

## 64 **Introduction**

65 Native Hawaiians are the second fastest growing ethnic group in the U.S., growing  
66 40% from the 2000 to 2010 U.S. census [1]. Moreover, Native Hawaiians display alarming  
67 rates of obesity, coronary heart disease, diabetes, cardiovascular diseases, cancers, and  
68 other related chronic health conditions [2–9]. Epidemiological studies have shown that

69 49% of adult Native Hawaiians are obese, compared to 21% of European Americans and  
70 13% of Japanese Americans living in Hawai'i **Error! Reference source not found.**, with >  
71 2x and 5x higher odds of being obese than European- and Asian-Americans, respectively,  
72 after adjusting for socioeconomic status [6]. In addition, Native Hawaiians are ~2-3 times  
73 more likely to develop Type-2 diabetes (T2D) than their European American counterparts,  
74 even after adjusting for common modifiable risk factors such as BMI and socioeconomic  
75 covariates [4]. Similarly, Native Hawaiians are ~1.7 times more likely to develop  
76 cardiovascular diseases than European Americans [8], and cardiometabolic risk factors  
77 such as hypertension have been shown to be associated with genealogical estimates of  
78 proportion of Native Hawaiian ancestry [9]. Taken together, these observations suggest  
79 that in addition to non-genetic risk factors such as lifestyle or diet, there may be systematic  
80 differences in the number, frequency, or effect size of genetic risk alleles that contribute  
81 to epidemiological differences between Native Hawaiians and other continental  
82 populations. Yet, such genetic investigation has not been conducted and despite  
83 awareness and efforts to include more non-European populations in genomic studies,  
84 indigenous populations such as Native Hawaiians remain understudied [10–12].

85 Today, Native Hawaiians are an admixed population. Their ancestors settled the  
86 Hawai'i archipelagos approximately 1,200-2,000 years ago and remained isolated there  
87 until 1778 when they encountered Western explorers who brought novel infectious agents  
88 that decimated the Native Hawaiian population before they rebounded over the last  
89 couple of centuries [13–16]. During the 18<sup>th</sup> and 19<sup>th</sup> centuries, Native Hawaiians became  
90 admixed with European and East Asian immigrants to the islands. The 2010 U.S. census  
91 data suggests that only approximately 1.2 million individuals in the U.S. derive some

92 proportion of their ancestry from Native Hawaiians, accounting for about 0.4% of the U.S.  
93 population. The small population size may be one of the challenges in recruiting large  
94 cohorts, which contributes to the reason that this population is under-investigated from a  
95 genetic standpoint.

96 To begin filling the missing gap in the genetic understanding of disease risks in Native  
97 Hawaiians, we first distinguished a Native Hawaiian-specific component of ancestry from  
98 other continental ancestries, and tested the association of this global (genomic) ancestry  
99 to complex traits and diseases in Native Hawaiians. We presumed this component of  
100 ancestry to be Polynesian in origin, although we cannot discount the possibility that this  
101 component of ancestry has diverged from the prevalent ancestry component found in  
102 other extant Polynesian populations today. We further stress that associations between  
103 estimated global Polynesian ancestry and any phenotype will also capture any non-  
104 genetic cultural or environmental effects that are correlated with Polynesian ancestry.  
105 These variables are typically measured with considerable error; thus, adjustment for them  
106 does not exclude residual effects. Therefore, an observed association with genetic  
107 ancestry is not evidence for a deterministic impact attributed to the Polynesian genetic  
108 ancestry alone. Nevertheless, an observed association with genetic ancestry may imply  
109 that genetic mapping studies could identify genetic susceptibility factors enriched in the  
110 Polynesian populations that may be useful in suggesting underlying biological  
111 mechanisms.

112 We then tested the association of local Polynesian ancestry with complex traits and  
113 diseases in what is known as admixture mapping. Admixture mapping assumes that  
114 causal variants leading to increased risk or trait values occur more frequently on

115 chromosomal segments inherited from the ancestral population that has higher disease  
116 risk or larger average trait values [17–19]. This technique is thus ideal as a first line  
117 analysis in understudied populations that are recently admixed. It has previously been  
118 used in African-American and Latino populations to identify novel genomic regions  
119 associated with phenotypes such as asthma, blood cell traits, breast and prostate cancer  
120 (reviewed in ref [17]), but has not yet been applied to Native Hawaiians.

121

## 122 **Results**

### 123 **Impact of global genetic ancestry on cardiometabolic traits in Native Hawaiians.**

124 We used 3,940 self-identified Native Hawaiians from the Multiethnic Cohort (MEC)  
125 [20] that were genotyped on the MEGA array [21] to assess the impact of global ancestry  
126 on health. We first needed to construct a reference panel for Polynesian (PNS) ancestry  
127 since there is no publicly available reference panel for the PNS ancestry among Native  
128 Hawaiians. (Note: we refer to this ancestral component as Polynesian for simplicity.)  
129 Among the 3,940 Native Hawaiians in our dataset, we identified a panel of 178 unrelated  
130 Native Hawaiian individuals with the highest estimated amount of PNS ancestry (>90%  
131 in unsupervised ADMIXTURE analysis; **Methods**) after accounting for other sources of  
132 recent admixtures, namely Europeans (EUR), East Asians (EAS), and Africans (AFR).  
133 Using this reference panel, we computed a haplotype-based estimate of global genetic  
134 ancestry for each of the remaining 3,762 individuals, and kept 3,428 unrelated individuals  
135 after excluding for the first-degree relatedness in our dataset (**Methods**).

136 We then assessed in Native Hawaiians the association of each component of  
137 ancestries with a set of quantitative and binary cardiometabolic traits. Specifically, we

138 focused on three disease categories for which the Native Hawaiians have shown  
139 increased risks in previous epidemiological studies: obesity [3,6], T2D [4], and  
140 cardiovascular disease [8,9]. We also examined quantitative traits and biomarkers  
141 associated with these diseases, namely BMI at baseline, fasting glucose and insulin level,  
142 HDL, LDL, triglycerides, and total cholesterol. More importantly, because non-genetic  
143 factors, such as socioeconomic status (SES) and lifestyle factors, could potentially  
144 confound the association between global genetic ancestry and risk of diseases, we  
145 attempted to adjust for these factors using education as individual level proxy to SES  
146 (**Methods**). Overall, we found that higher PNS ancestry is strongly associated with higher  
147 risk of obesity, T2D, heart failure (HF), and consistently, with higher BMI and lower HDL  
148 levels among the quantitative traits (**Table 1, S1-15 Tables**). For example, we observed  
149 that, holding the proportion of EAS and AFR ancestry constant, every 10% increase in  
150 the PNS ancestry in our cohort corresponded to a 0.059 s.d. (or 0.35 BMI unit) increase  
151 in BMI and a 1.09 times the odds of T2D (after adjusting for BMI). We observed opposite  
152 effects of PNS ancestry on waist-to-hip ratio (WHR) in males and females separately,  
153 though the statistical significance is marginal (**Table 1, S2 Table**). For T2D, HF,  
154 hypertension (HYPERT), and ischemic heart disease (IHD), BMI is an established risk  
155 factor. In our models, we also found BMI to be strongly associated with disease risk for  
156 these conditions (max  $P < 1 \times 10^{-7}$ ; **S10-11, S13-14 Tables**). For T2D and HF, we  
157 observed a strong association between disease risk and PNS ancestry even after  
158 accounting for BMI, suggesting additional risk factors that are specific or correlated to the  
159 PNS ancestry (**Table 1**). For HYPERT and IHD, we observed a weak but nominally  
160 significant association between PNS ancestry and disease risk if we do not account for

161 BMI. In fact, for most traits tested, the effect sizes due to PNS ancestry are lower after  
 162 adjusting for BMI (**S1 Fig**), suggesting that at least part of the excessive risk for these  
 163 traits may be mediated through BMI. Finally, other components of ancestry found in  
 164 Native Hawaiians also exert an effect, as we observed that higher East Asian ancestry  
 165 component are associated with increased risk of T2D, hyperlipidemia, and hypertension,  
 166 but lower BMI and lowered risk of obesity (**Table 1**).

167

168 **Table 1: summary of association between global genetic ancestry and quantitative and binary**  
 169 **cardiometabolic traits in the Native Hawaiians.**

| Trait               | PNS            |                                          | EAS            |                                           | AFR     |         |
|---------------------|----------------|------------------------------------------|----------------|-------------------------------------------|---------|---------|
|                     | $\beta$        | P-value                                  | $\beta$        | P-value                                   | $\beta$ | P-value |
| Quantitative Traits |                |                                          |                |                                           |         |         |
| BMI                 | <b>0.5923</b>  | <b><math>1.04 \times 10^{-10}</math></b> | <b>-0.6400</b> | <b><math>&lt;2 \times 10^{-16}</math></b> | 1.0777  | 0.0948  |
| WHR (male)          | -0.3592        | 0.0179                                   | -0.1358        | 0.2664                                    | 1.9487  | 0.1218  |
| WHR (female)        | 0.2272         | 0.0985                                   | 0.2587         | 0.0139                                    | -0.1722 | 0.8524  |
| Glucose             | -0.0129        | 0.929                                    | 0.1355         | 0.232                                     | 0.7825  | 0.463   |
| Insulin             | 0.2858         | 0.0472                                   | 0.0048         | 0.966                                     | 0.6249  | 0.5573  |
| HDL                 | <b>-0.4715</b> | <b><math>1.40 \times 10^{-4}</math></b>  | 0.1753         | 0.0700                                    | -1.4498 | 0.0988  |
| LDL                 | 0.0736         | 0.557                                    | 0.0720         | 0.463                                     | -0.5192 | 0.559   |
| TG                  | 0.1387         | 0.0342                                   | 0.1426         | 0.0053                                    | 0.1639  | 0.7237  |
| TC                  | -0.0441        | 0.7228                                   | 0.2072         | 0.0331                                    | -0.8084 | 0.3602  |
| Categorical Traits  |                |                                          |                |                                           |         |         |
| Obesity             | <b>1.2164</b>  | <b><math>2.24 \times 10^{-7}</math></b>  | <b>-1.3596</b> | <b><math>5.40 \times 10^{-11}</math></b>  | 1.3181  | 0.3979  |
| T2D                 | <b>1.2416</b>  | <b><math>1.04 \times 10^{-9}</math></b>  | <b>0.6836</b>  | <b><math>2.05 \times 10^{-5}</math></b>   | 1.1393  | 0.4220  |
| T2D (adj BMI)       | <b>0.8209</b>  | <b><math>1.65 \times 10^{-4}</math></b>  | <b>1.1765</b>  | <b><math>1.30 \times 10^{-11}</math></b>  | 0.3603  | 0.8125  |
| HF                  | <b>1.3104</b>  | <b><math>1.99 \times 10^{-6}</math></b>  | -0.0224        | 0.9209                                    | 3.4587  | 0.0493  |
| HF (adj BMI)        | <b>1.0465</b>  | <b><math>2.18 \times 10^{-4}</math></b>  | 0.2528         | 0.2797                                    | 3.4653  | 0.0593  |
| HYPERT *            | 0.0652         | 0.792                                    | <b>0.6973</b>  | <b><math>5.30 \times 10^{-4}</math></b>   | 0.9841  | 0.5731  |
| HYPERT              | 0.6461         | 0.0100                                   | <b>0.7363</b>  | <b><math>2.74 \times 10^{-4}</math></b>   | -0.6385 | 0.7081  |
| HYPERT (adj BMI)    | 0.3842         | 0.135                                    | <b>0.8783</b>  | <b><math>1.89 \times 10^{-5}</math></b>   | -0.9459 | 0.585   |
| IHD                 | 0.4787         | 0.0496                                   | 0.0164         | 0.9327                                    | -0.3750 | 0.8270  |
| IHD (adj BMI)       | 0.2881         | 0.2457                                   | 0.1445         | 0.4633                                    | -0.7074 | 0.6871  |
| TIA                 | 0.4876         | 0.143                                    | -0.0201        | 0.941                                     | 2.3080  | 0.278   |
| TIA (adj BMI)       | 0.3612         | 0.2839                                   | 0.0719         | 0.7928                                    | 2.1347  | 0.3226  |

170

171 We present the effect sizes ( $\beta$ , in units of s.d. for quantitative traits and log odds for binary traits) and p-  
 172 values for the final model after accounting for covariates for PNS, EAS, and AFR ancestries, using proportion  
 173 of EUR ancestry as baseline (**Method**). In all binary traits other than obesity, results adjusting for BMI as a



174 covariate in the model are also reported (\* BMI was not found to be associated with HYPERL and thus was  
175 not adjusted in the model). Effect sizes and P-values that are significant after adjusting for testing 14 traits  
176 are bolded. Abbreviations: BMI, body mass index; HDL, high-density lipoprotein; LDL, low-density  
177 lipoprotein; TG, triglycerides; TC, total cholesterol; T2D, Type-2 diabetes; HF, heart failure; HYPERL,  
178 hyperlipidemia; HYPERT, hypertension; IHD, ischemic heart disease; TIA, stroke and transient ischemic  
179 attack. For full model of each trait tested, please refer to **S1-15 Tables**.

180  
181       Because, as mentioned above, non-genetic factors such as socioeconomic status  
182 could confound our analysis, we further tested if adding neighborhood SES could account  
183 for these associations. Neighborhood SES (nSES) is a validated composite measure  
184 created by principal component analysis that incorporates U.S. Census data on education,  
185 occupation, unemployment, household income, poverty, rent, and house values [22]. This  
186 nSES measure was categorized into quintiles based on the nSES distribution of Hawaii  
187 census tracts and Native Hawaiian subjects were assigned a quintile based on their  
188 geocoded baseline address (**Methods**). For BMI/obesity, HDL, T2D, and HF that showed  
189 significant association with proportion of PNS ancestry, adding nSES into the model  
190 showed that nSES was statistically significantly associated with each outcome, and  
191 accounted for some proportion of the risk. However, the association between proportion  
192 of PNS ancestry and each of these outcomes remained highly significant, with the  
193 exception of HDL, which became nominally significant (**Table 2, S1, S5, S9-11 Tables**).  
194 These results are again consistent with the possibility that unique Polynesian genetic risk  
195 factors exist in the Native Hawaiians that partly explain the elevated risk.

196

197 **Table 2: summary of association between global genetic ancestry and quantitative and binary**  
198 **cardiometabolic traits in the Native Hawaiians, after adding nSES into the previous model that only**  
199 **adjusted for individual level covariates.**

| Trait         | PNS           |                                         | EAS            |                                          | AFR     |         |
|---------------|---------------|-----------------------------------------|----------------|------------------------------------------|---------|---------|
|               | $\beta$       | P-value                                 | $\beta$        | P-value                                  | $\beta$ | P-value |
| BMI           | <b>0.4974</b> | <b><math>2.26 \times 10^{-7}</math></b> | <b>-0.6113</b> | <b><math>1.37 \times 10^{-15}</math></b> | 0.8537  | 0.201   |
| HDL           | -0.3027       | 0.0201                                  | 0.1725         | 0.0891                                   | -0.9393 | 0.3021  |
| Obesity       | <b>1.0774</b> | <b><math>1.29 \times 10^{-5}</math></b> | <b>-1.3105</b> | <b><math>1.03 \times 10^{-9}</math></b>  | 1.2973  | 0.4141  |
| T2D (adj BMI) | <b>0.7575</b> | <b><math>8.51 \times 10^{-4}</math></b> | <b>1.1569</b>  | <b><math>6.92 \times 10^{-11}</math></b> | 0.2535  | 0.8668  |
| HF (adj BMI)  | <b>1.0201</b> | <b><math>7.41 \times 10^{-4}</math></b> | 0.2775         | 0.2588                                   | 3.4056  | 0.0714  |

200  
201 We present the effect sizes ( $\beta$ , in units of s.d. for quantitative traits and log odds for binary traits) and p-  
202 values for the final model after accounting for covariates for PNS, EAS, and AFR ancestries, using proportion  
203 of EUR ancestry as baseline (**Method**). Effect sizes and P-values that are significant after adjusting for  
204 testing 14 traits are bolded.

205  
206 As the strongest association with genetic ancestry came from BMI, we further  
207 investigated the association between BMI and PNS ancestry in stratified analysis. We  
208 found no evidence of difference between sexes (data not shown). However, we did  
209 observe a strong difference in the strength of association stratified by T2D disease status.  
210 Specifically, among T2D cases, we found no significant association between BMI and  
211 proportion of PNS ancestry ( $P = 0.112$ ; **Fig 1, S16 Table**). On the other hand, among  
212 T2D controls, individuals were predicted to have 0.087 s.d. (or 0.51 units) or higher BMI  
213 per 10% increase in PNS ancestry ( $P = 1.4 \times 10^{-13}$ ). This is despite the T2D strata having  
214 similar sample sizes (1,310 cases vs. 1,799 controls). A BMI model including interaction  
215 between T2D strata and PNS ancestry showed significant negative interaction ( $P =$   
216  $0.0004$ , **S17 Table**). One interpretation is that relative individuals of other ancestries, BMI  
217 was only marginally increased among individuals with PNS ancestry when affected by  
218 T2D suggesting that there are alternative pathways (other than BMI) that contributes to

219 T2D risk in the Polynesian population. This is consistent with our observation that PNS  
220 ancestry is independently associated with higher risk for T2D (**Table 1**, with adjustment  
221 of BMI).

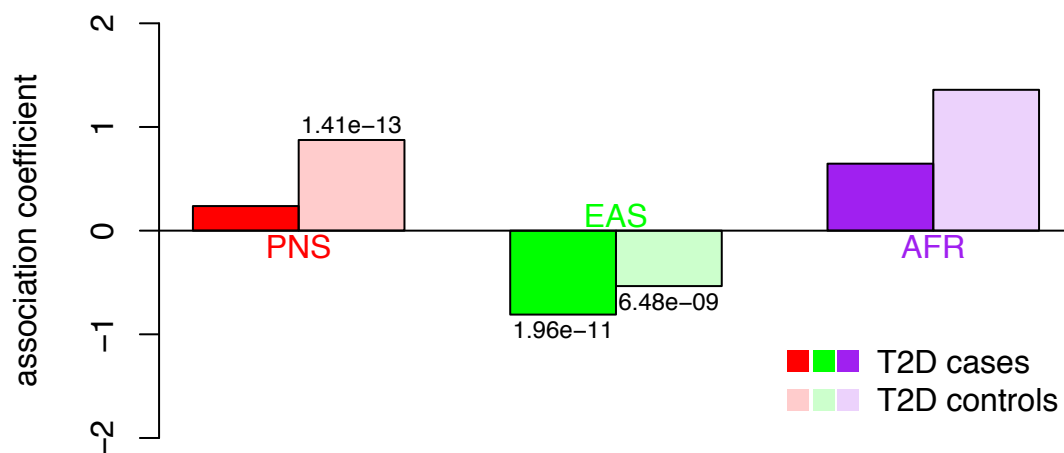

222  
223 **Fig 1: Stratified association testing between global genetic ancestry and BMI.** Individuals were  
224 stratified based on T2D disease status. Cases are colored in darker color, controls in lighter color. P-values  
225 for significant association coefficients are provided. The strongly significant association between PNS  
226 ancestry and BMI among T2D controls, but not cases, is suggestive of an interaction between PNS ancestry  
227 and T2D.

228  
229 For a subset of ~300 Native Hawaiians in our cohort, we also have measures of  
230 subcutaneous fat and visceral fat, as well as lean mass vs. fat mass obtained through  
231 dual-energy x-ray absorptiometry and abdominal magnetic resonance imaging [23]. In  
232 this small subcohort, we found that increasing PNS ancestry to be more strongly and  
233 positively associated with subcutaneous fat ( $P = 4.88 \times 10^{-6}$ ) compared to visceral fat ( $P =$   
234 0.014) (**Table 3**). There was no association with lean-to-fat mass ratio ( $P = 0.76$ ),  
235 suggesting that PNS ancestry is associated with body fat distribution but not necessarily  
236 body fat composition. Because anthropometric measures of body fat distribution such as

237 Waist-to-hip ratio often differ between male and females, we also conducted sex-stratified  
 238 analysis. We observed similar trend of associations between subcutaneous fat vs.  
 239 visceral fat, though the association seems more strongly driven by males (**Table 3**).

240  
 241 **Table 3: Association of global ancestry with measures of fat distribution or fat composition among**  
 242 **Native Hawaiians.**

|                               | Combined         |                             | Male            |                             | Female          |               |
|-------------------------------|------------------|-----------------------------|-----------------|-----------------------------|-----------------|---------------|
|                               | Estimate (s.e.)  | P                           | Estimate (s.e.) | P                           | Estimate (s.e.) | P             |
| <b>Subcutaneous Fat</b>       |                  |                             |                 |                             |                 |               |
| Intercept                     | -0.39 (0.25)     | 0.11                        | -0.58 (0.35)    | 0.10                        | -0.25 (0.37)    | 0.51          |
| PNS                           | 1.30 (0.28)      | <b>4.88x10<sup>-6</sup></b> | 1.52 (0.4)      | <b>2.29x10<sup>-4</sup></b> | 1.14 (0.4)      | <b>0.0052</b> |
| EAS                           | -0.14 (0.22)     | 0.54                        | 0.050 (0.33)    | 0.88                        | -0.28 (0.32)    | 0.38          |
| AFR                           | 3.16 (1.80)      | 0.080                       | 5.45 (3.62)     | 0.13                        | 2.46 (2.12)     | 0.25          |
| Total fat mass                | -0.0044 (0.0081) | 0.59                        | -0.0033 (0.013) | 0.80                        | -0.0056 (0.011) | 0.62          |
| <b>Visceral Fat</b>           |                  |                             |                 |                             |                 |               |
| Intercept                     | -0.26 (0.26)     | 0.31                        | -0.11 (0.37)    | 0.77                        | -0.48 (0.38)    | 0.20          |
| PNS                           | 0.71 (0.29)      | <b>0.014</b>                | 0.55 (0.42)     | 0.19                        | 0.98 (0.4)      | <b>0.016</b>  |
| EAS                           | -0.29 (0.23)     | 0.21                        | -0.092 (0.35)   | 0.79                        | -0.36 (0.32)    | 0.27          |
| AFR                           | 3.45 (1.85)      | 0.064                       | 6.54 (3.82)     | 0.089                       | 2.45 (2.13)     | 0.25          |
| Total fat mass                | 0.0012 (0.0083)  | 0.89                        | -0.0082 (0.013) | 0.54                        | 0.0073 (0.011)  | 0.52          |
| <b>Lean-to-Fat Mass Ratio</b> |                  |                             |                 |                             |                 |               |
| Intercept                     | 0.11 (0.18)      | 0.55                        | 0.49 (0.28)     | 0.079                       | -0.23 (0.25)    | 0.37          |
| PNS                           | -0.087 (0.29)    | 0.76                        | -0.64 (0.42)    | 0.13                        | 0.40 (0.39)     | 0.31          |
| EAS                           | -0.28 (0.24)     | 0.24                        | -0.77 (0.35)    | 0.030                       | 0.15 (0.33)     | 0.64          |
| AFR                           | 0.86 (1.95)      | 0.66                        | 0.55 (4.21)     | 0.90                        | 1.02 (2.21)     | 0.64          |

243  
 244 N = 280, 280, and 294 for analysis on subcutaneous fat, visceral fat, and lean-to-fat mass ratio, respectively.  
 245 In sex-stratified analysis, N = 128, 128, and 136 males for analysis on subcutaneous fat, visceral fat, and  
 246 lean-to-fat mass ratio, respectively; N = 152, 152, and 158 females for analysis on subcutaneous fat,  
 247 visceral fat, and lean-to-fat mass ratio, respectively.

248  
 249 **Mapping of cardiometabolic traits using local genetic ancestry in Native Hawaiians.**

250 We next examined the impact of local genetic ancestry on cardiometabolic traits in Native  
 251 Hawaiians through admixture mapping using linear or logistic regression models. We only  
 252 analyzed the traits that exhibited a significant association with the global PNS ancestry.

253 We used a threshold of  $2.2 \times 10^{-5}$  to declare genome-wide significance with a trait  
254 **(Method)**.

255 Across the 2 quantitative (BMI and HDL) and 2 binary (T2D and HF; obesity was  
256 not included as the definition of obese status is dependent on BMI) traits examined  
257 through admixture mapping, we identified one region that surpassed our genome-wide  
258 significance threshold (**Fig 2**): 62.7Mb to 65.7Mb on chr6 for T2D (**Table 4, Fig 2**). We  
259 further defined a broader region encompassing neighboring regions with admixture *P*-  
260 value less than  $1 \times 10^{-4}$  as potential regions that may harbor causal allele(s). For this  
261 broader region spanning 11.4 Mb on chr6 (**Table 4**), we examined if known variants  
262 reported in the GWAS catalog could account for the signals we found through admixture  
263 mapping. We found 2 variants in the GWAS catalog for T2D that fall within our admixture  
264 peak (**S18 Table**). We imputed these two variants using 1000Genomes (phase 3) as the  
265 reference panel and found that conditioning on these variants did not significantly change  
266 our admixture mapping results (top *P*-value =  $6.22 \times 10^{-6}$ ; **S2 Figure**). These results  
267 suggest that our signals detected through admixture mapping may potentially be novel.  
268

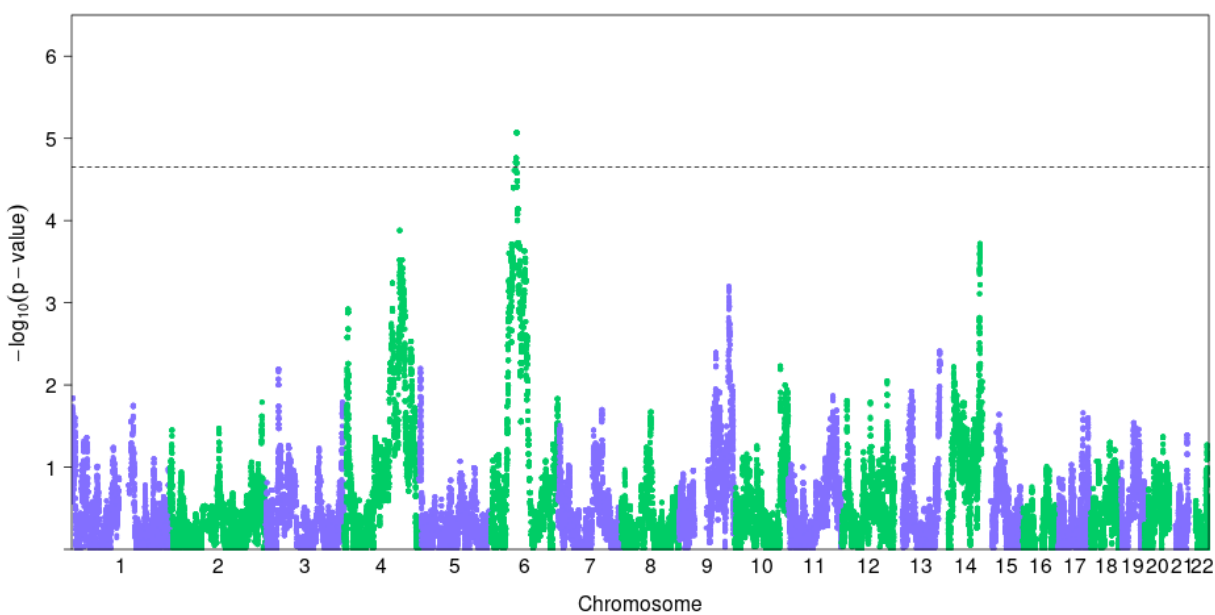

269

270 **Fig 2: Manhattan plot of admixture mapping results for T2D.** Dotted line denotes the genome-wide

271 significance threshold for each trait at  $2.2 \times 10^{-5}$ , determined through permutation.

272

3

4 **Table 4: summary of significant loci identified through admixture mapping.**

|       |     | Admixture Mapping             |                                      |            |                                     |            | Single Variant Top Signal |             |       |                       |                 |
|-------|-----|-------------------------------|--------------------------------------|------------|-------------------------------------|------------|---------------------------|-------------|-------|-----------------------|-----------------|
| Trait | Chr | Peak -<br>log <sub>10</sub> P | Signal Region<br>Start – Stop (hg19) |            | Broad Region<br>Start – Stop (hg19) |            | N <sub>SNP</sub> tested   | SNP ID      | OR    | P-value *             | Nearest<br>Gene |
| T2D   | 6   | 5.07                          | 62,697,746                           | 65,763,203 | 57,098,973                          | 68,542,828 | 29,751                    | rs370140172 | 1.096 | 1.25x10 <sup>-5</sup> | EYS             |

5

6 The signal region from admixture mapping was defined as the interval between which admixture mapping P-value is below the genome-wide significance threshold  
7 of  $2.2 \times 10^{-5}$  ( $-\log_{10}P = 4.65$ ). Broad region was defined as the interval between which admixture mapping P-value is below  $1 \times 10^{-4}$ ; continuous segments with admixture  
8 mapping P-value below  $1 \times 10^{-4}$  but within 5 Mb are also merged. Within each broad region, we report the variant with strongest association with the trait through  
9 either single variant association testing. \* For the chromosome 6 region, rs370140172 would be significantly associated with T2D after correcting for number of  
0 variants tested in the region by permutation (at 5% FDR, critical threshold =  $1.51 \times 10^{-5}$ ).

1

282

283           To fine-map the candidate region on chromosome 6, we conducted single variant  
284 association tests (**Fig 3**). We imputed the full dataset of 3,940 individuals using 1000  
285 Genomes as reference to increase coverage across the region, and accounted for cryptic  
286 relatedness and population structure in a logistic mixed model (**Methods**). We found that  
287 the top associated variant on chr6 for T2D was a well-imputed (INFO score = 0.86) 5'  
288 UTR variant rs370140172 (OR = 1.096,  $P = 1.25 \times 10^{-5}$ , **Fig 3**). Its association with T2D  
289 was significant after accounting for number of markers tested in this region (regional  
290 significance threshold =  $1.51 \times 10^{-5}$ ; **Table 3**). This variant showed a large difference in  
291 frequency between Native Hawaiians (MAF = 24.2% among our reference PNS  
292 individuals; 11.2% among MEC-NH population) and European (0%) or East Asian (0.9%)  
293 individuals from 1000 Genomes (**S19 Table**). Conditioning on rs370140172 also  
294 drastically reduced the admixture association signal (minimum  $P \sim 0.001$  in the region;  
295 **S3 Fig**). Taken together, these observations suggest that rs370140172 or its proxy could  
296 be the allelic association driving the admixture signal.

297



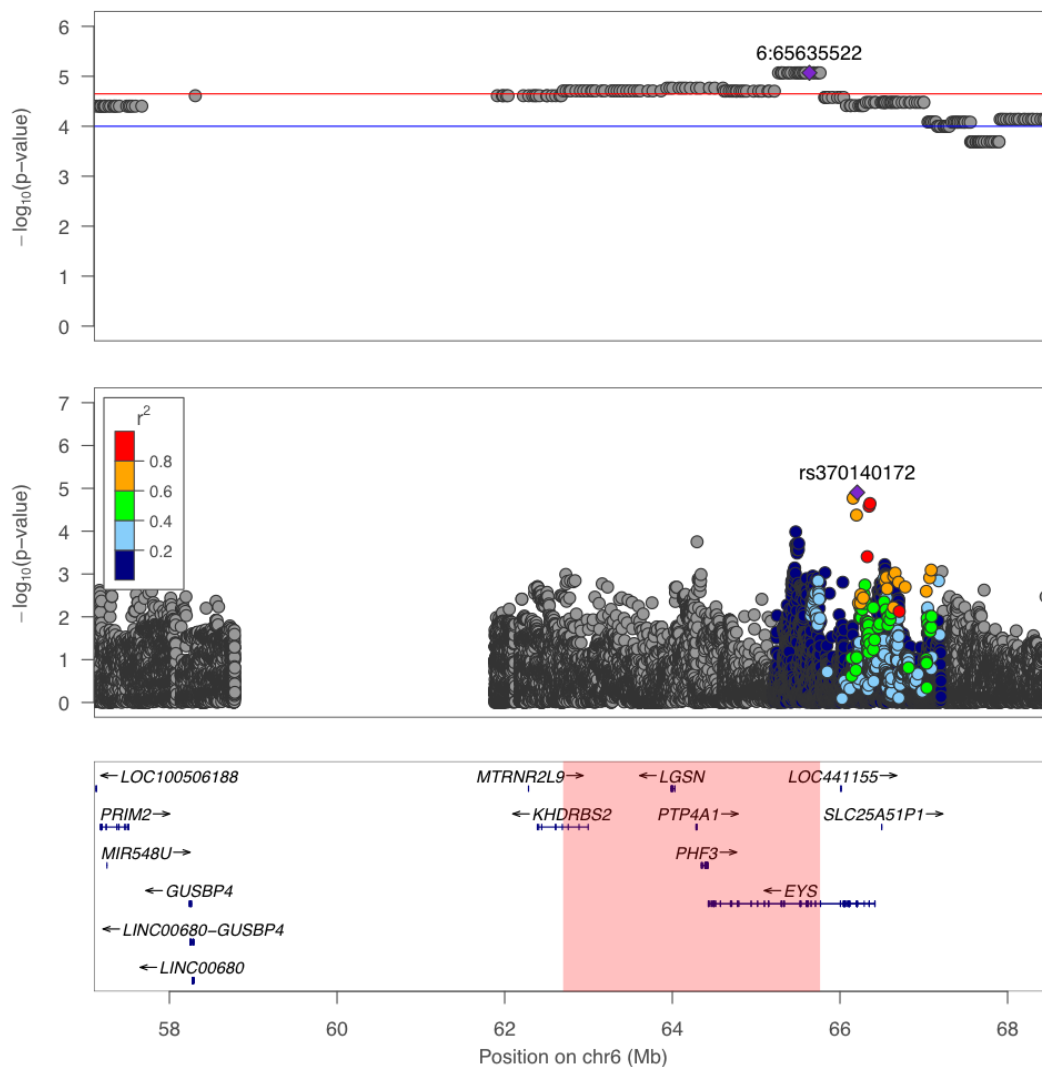

298

299 **Fig 3. Association signals with T2D in the broad region of chr 6.** The top panel depicts association  
300 signals from admixture mapping; middle panel depicts the single variation association, and bottom panel  
301 the genomic coordinates and nearby genes. Highlighted region at the bottom indicated the signal region as  
302 defined in Table 2.

303

304 We attempted to replicate the single variant signal on chromosome 6 by examining the  
305 lead variant and its proxies for association with T2D in another Polynesian population of  
306 2,852 Samoan individuals, including 475 cases and 2,377 controls. We found no  
307 significant associations (minimum  $P = 0.743$ ; **S20 Table**). However, we noted that the  
308 derived allele of rs370140172 had a significantly lower frequency in the Samoans (8.7%,  
309 compared to 24.2% in reference PNS individuals). The lower frequency of the allele and  
310 the current sample size does not provide sufficient power to replicate the association  
311 signal even at nominal significance level of 0.05 (Power = 14.2%; **S4 Figure**). Because  
312 of the difference in frequency between Native Hawaiians and Samoans, we also  
313 examined if this locus exhibits signals of positive natural selection in the Native Hawaiians  
314 (**Methods**). We found the derived allele to indeed sit on the longer haplotypes in Native  
315 Hawaiians, although the statistical significance is marginal compared to other loci of  
316 similar derived allele frequency in the genome (Z-score = +1.38; empirical  $P = 0.067$ ).  
317 Thus, the elevated frequency in MEC-NH may still be the result of genetic drift.

318

## 319 **Discussion**

320 This study aimed to fill a gap of genetic research in Native Hawaiians. We focused  
321 on studying the association of genetic ancestry, both globally and locally, to diseases for  
322 which Native Hawaiians showed increased risk. While the focus is on genetic ancestry,  
323 we emphasize that our approach does not constitute a methodology to quantify the  
324 degree of indigenusness among individuals native to the Hawaiian archipelago.  
325 Estimating proportion of genetic ancestry is not without errors, the results may change  
326 depending on the input genetic or reference data, and there is a conceptual difference

327 between genetic ancestry and genealogical ancestry. Moreover, there are also difficulties  
328 in interpreting the estimated proportion; in this paper we made the simplifying assumption  
329 that the predominant component of ancestry found in MEC-NH individuals but not in other  
330 continental populations is Polynesian in origin. Given these caveats, we therefore believe  
331 the approach described here should not supplant current approaches, such as through  
332 self-reports or genealogical records, to define community membership. Consistent with  
333 this belief, we analyzed all individuals with available genetic data who self-identify as at  
334 least part Native Hawaiian ancestry; we did not attempt to define a population of Native  
335 Hawaiians using genetic data.

336 We began our analysis by modeling Polynesian ancestry. We first conducted  
337 ADMIXTURE analysis to identify an internal Native Hawaiian ancestry reference panel  
338 since there is no appropriate representative panel currently available. Consistent with  
339 their known history, we found Native Hawaiians to be a recently admixed population,  
340 deriving the largest proportion of their genetic ancestry from a presumed Polynesian  
341 ancestral component (on average ~40.2%). We also found that global Polynesian  
342 ancestry from MEC-NH is positively and statistically significantly associated with BMI,  
343 HDL, Type-2 diabetes, obesity and heart failure after adjusting for other components of  
344 ancestries and available non-genetic covariates (**Table 1 and 2**). Polynesian ancestry  
345 was also nominally associated with WHR (in males), insulin level, triglycerides,  
346 hypertension and ischemic heart diseases, but these associations did not remain  
347 statistically significant after Bonferroni correction for the multiple traits that we tested in  
348 this study (**Table 1**). We then examined the association between local Polynesian  
349 ancestry and BMI, HDL, T2D, and HF. We found a 3.06 Mb region on chr6 possibly

350 associated with Type-2 diabetes (**Fig 2** and **3**). Conservatively, we searched an expanded  
351 broader region encompassing 11.4Mb (**Fig 3, Table 4**) for known GWAS variants for T2D  
352 and showed that these known variants could not explain signal we detected (**S2 Fig, S18**  
353 **Table**). Furthermore, single variant fine-mapping of the broad regions implicated a variant  
354 (rs370140172) on chr6 for T2D that was significantly associated with T2D after correcting  
355 for number of variants tested in permutation (**Table 4**) and showed large frequency  
356 differences between populations (**S19 Table**) that could account for the signal in local  
357 ancestry association (**S3 Fig**). Taken together, our findings suggest that these regions  
358 should be targeted for further investigation and replication in the future, preferably in  
359 additional Native Hawaiian or Polynesian populations.

360         The strong association between global ancestry and disease risks or related  
361 quantitative phenotypes suggests the presence of population-specific variants that could  
362 contribute to the increased risk observed in these populations. For example, a recently  
363 reported, Polynesian-specific, *CREBRF* variant discovered in Samoans was strongly  
364 associated with the odds of obesity, a finding that we previously replicated in Native  
365 Hawaiians [24]. However, we should also stress that an association with global ancestry  
366 would also in theory capture any non-genetic cultural or environmental effects that are  
367 correlated with ancestry. We attempted to control for non-genetic factors such as  
368 education, representing individual-level socioeconomic status (SES), and behavioral  
369 traits, such as cigarette smoking. We also examined the possibility that our observed  
370 associations with global ancestry was due to community-level SES by including  
371 neighborhood income levels in the model (**Table 2**). Admittedly, these variables are still  
372 imperfect proxies for SES and non-genetic factors certainly play a role in the etiology of

373 these traits. Future studies may further integrate both individual-level (e.g. physical  
374 activity, diet, alcohol or medication use) and community-level (e.g. discrimination) non-  
375 genetic factors. Therefore we should interpret these associations with global ancestry  
376 with much caution.

377         These caveats notwithstanding, one notable observation is the association  
378 between global PNS ancestry and BMI. In analysis stratified by T2D status, despite  
379 having similar numbers of cases and controls, we found that PNS ancestry is not  
380 associated with BMI among T2D cases, but is associated with higher BMI among  
381 individuals unaffected by T2D (**S16 Table**). In models including interaction between global  
382 ancestry and T2D, we again observed that while T2D cases generally have higher BMI,  
383 those with greater PNS ancestry would actually have lowered BMI than those with less  
384 PNS ancestry (**S17 Table, Fig 1**). We interpret these findings to suggest that while PNS  
385 ancestry is positively associated with BMI, it is not proportionally increasing the risk of  
386 T2D compared to other ancestries. One possible explanation for this is through differential  
387 body composition. For example, individuals with increasing PNS ancestry may possess  
388 more lean mass, which contributes to BMI, than fat mass, which contributes to BMI and  
389 risk for T2D. There are some suggestions that individuals of PNS ancestry preferentially  
390 have greater lean mass than fat mass [25], although data is limited and we found no  
391 association between PNS ancestry and lean-to-fat mass ratio in a small subcohort of  
392 MEC-NH (**Table 2**). An alternative explanation is through differential fat distribution. For  
393 example, individuals with increasing PNS ancestry may preferentially store fat  
394 subcutaneously, which contribute to general adiposity and BMI but not necessarily to T2D,  
395 rather than viscerally, which could lead to insulin resistance and contribute to peripheral

396 insulin sensitivity and further T2D [26,27]. We did find a stronger association between  
397 PNS ancestry with subcutaneous fat compared to visceral fat among our small sub-cohort  
398 of MEC-NH (**Table 2**), and it may be possible there are differences in deep versus  
399 superficial subcutaneous fat storage that we have not investigated. Ultimately, more data  
400 will be needed to make firm conclusions. What seems to be clear from our result is an  
401 independent pathway beyond BMI through which Native Hawaiians are also at risk for  
402 T2D. The negative interaction between T2D and PNS ancestry in the BMI model suggests  
403 individuals with increasing PNS ancestry are affected with T2D at lower BMI. In support  
404 of this hypothesis, we found that PNS ancestry is positively associated with risk of T2D  
405 even after adjusting for BMI (**Table 1**).

406         We conducted admixture mapping testing the association between local PNS  
407 ancestry genome-wide with the traits significantly associated with global PNS ancestry.  
408 Because admixture mapping had not been previously conducted among Native  
409 Hawaiians and the haplotypic pattern and LD structure within Native Hawaiians had not  
410 been previously explored, we used permutation to establish the genome-wide threshold  
411 for significance for a single trait, which we determined to be  $2.2 \times 10^{-5}$ . Using this threshold,  
412 we found one notable region on chr6 associated with T2D.

413         Single variant fine-mapping of these regions showed a significant association on  
414 chr6 (rs370140172,  $P = 1.25 \times 10^{-5}$ ) after correcting for number of variants tested by  
415 permutation (regional significance threshold =  $1.51 \times 10^{-5}$ ). This variant was imputed with  
416 high accuracy (INFO score = 0.86), exhibits large frequency enrichment compared to  
417 other populations (24% in non-admixed Native Hawaiians but monomorphic in 1KGP  
418 EUR and < 1% in 1KGP EAS; gnomAD v3 overall frequency = 0.00054), and explained

419 the admixture mapping signal we detected (**S3 Fig**). Rs370140172 falls within the 5' UTR  
420 (2<sup>nd</sup> exon) of the gene *EYS*. Mutations in *EYS* can cause recessive retinitis pigmentosa  
421 [28,29], but there was no obvious link to T2D other than a suggestive association with  
422 T2D in Europeans (rs10498828, ~670kb away,  $P=9 \times 10^{-6}$ ), and a genome-wide  
423 association with BMI in a Japanese population (rs148546399, ~1.5Mb away,  $P=1 \times 10^{-9}$ )  
424 [30,31]. Taken together, rs370140172 or its proxy may signal a novel population-specific  
425 candidate locus associated with T2D. We failed to replicate the association signal at this  
426 variant in a Samoan cohort. The failure to replicate could be partly explained by  
427 decreased power as the variant is rarer in Samoans and the cohort is relatively small.  
428 Furthermore, we may be limited by the availability of imputation panels; we used the 1000  
429 Genome Project as reference panel and, as such, a number of Polynesian-specific  
430 variants that could underlie the admixture signal in these region may not be well imputed.

431 In summary, Native Hawaiians exhibit an increased risk for obesity, type-2  
432 diabetes, and a number of cardiovascular diseases, but are generally understudied from  
433 a genetic standpoint in the literature. A better understanding of the genetic susceptibility  
434 risk factors will complement other epidemiological, non-genetic, risk factors for uniquely  
435 prevalent diseases among the Native Hawaiians. It is by integrating both genetic and non-  
436 genetic risk factors in our understanding of population-specific disease risk that we will  
437 have a better chance to control these diseases. Native Hawaiians have undergone a  
438 unique evolutionary history in their trans-Pacific voyages and settlement of the Hawaiian  
439 archipelago. Both the demographic and adaptive histories of these people may have  
440 shaped their genetic architecture. We present the first analysis of the genetic ancestry of  
441 present-day Native Hawaiians and suggest that it may have an impact on the risk of these

442 diseases. However, genetic ancestry also reflects non-genetic cultural or environmental  
443 effects and we cannot exclude residual confounding by these variables. Nevertheless, if  
444 specific genetic susceptibility variants could be identified, they may be useful in clarifying  
445 underlying biological mechanisms. Further studies focusing on indigenous Polynesian  
446 populations, such as Native Hawaiians, will advance the findings reported here and may  
447 help alleviate the disparity in genomic medical research existing for Native Hawaiians.



## 448 **Materials and Methods**

449 ***Study population.*** In this study, we used genetic and epidemiologic data from Native  
450 Hawaiian individuals from the Multiethnic Cohort (MEC). MEC is a prospective  
451 epidemiological cohort of >215,000 individuals spanning five major ethnicities, including  
452 biospecimen samples on >5,300 Native Hawaiians. It is currently the largest single cohort  
453 with genetic information on Native Hawaiians, and thus is ideal for our study. In this study,  
454 we used a subcohort of >3,900 individuals genotyped on the MEGA genotyping array [21]  
455 as part of the PAGE consortium [32]. The institutional review boards of the University of  
456 Hawai'i and the University of Southern California approved the study protocol. All  
457 participants signed an informed consent form.

458       Quality control of MEGA array was previously described [24]. In general, individual  
459 and genotype level quality control filters were previously applied as part of PAGE, and  
460 additionally we applied the following steps: All variant names were updated to dbSNP  
461 v144; duplicated loci and indels were removed; triallelic variants or variants with non-  
462 matching alleles to 1000 Genomes Project phase 3 (1KGP) were discarded; loci with  
463 unique positions not found in 1KGP were removed from the dataset; alleles were  
464 standardized to the positive strand by comparing to 1KGP. Finally, a genotype  
465 missingness filter of 5% and a minor allele frequency filter of 1% were applied, resulting  
466 in a total of 3,940 MEC Native Hawaiian (MEC-NH) individuals genotyped at 697,505  
467 SNPs.

468

469 ***Global and local ancestry inference.*** In addition to a predominant Polynesian (PNS)  
470 ancestry, Native Hawaiians are known to be recently admixed with individuals of

471 European and East Asian ancestry [14]. In order to define individual genetic ancestry,  
472 whether locally or globally, we needed a reference panel for the Polynesian component  
473 of the Native Hawaiian ancestry. As such a reference panel does not exist, we sought to  
474 construct an internal reference panel by identifying MEC-NH individuals with the largest  
475 amount of global Polynesian ancestry as previously described [24]. Briefly, we combined  
476 all MEC individuals genotyped on the same MEGA array (3,940 Native Hawaiians, 3,465  
477 Japanese, 30 Hispanic/Latinos, 5,325 African Americans) and all individuals from 1000  
478 genomes Project, pruned SNPs with  $r^2 > 0.1$  (using window sizes of 50 SNPs with steps  
479 of 10 SNPs across the genome), and partitioned the samples to two groups of related (up  
480 to and including 2<sup>nd</sup> degree) and unrelated individuals by KING (default threshold used).  
481 We then ran ADMIXTURE (v. 1.3.0) in unsupervised mode for unrelated samples, then  
482 projected the estimated ancestral allele frequency to the related samples to infer the  
483 genomic ancestries of the related group. We found stable estimates at  $k=4$  after 5  
484 iterations. MEC-NH individuals at  $k=4$  exhibited known components of ancestry from  
485 European, East Asian and African, as well as a component of ancestry that is unique to  
486 the MEC-NH, presumed to be Polynesian (**S5 Fig**). We then identified 178 unrelated  
487 MEC-NH individuals (kinship coefficient  $< 0.2$  estimated from PC-relate [33]) whose  
488 Polynesian component of ancestry were estimated to be over 0.9 as reference for the  
489 Polynesian component of the Native Hawaiian ancestry.

490 To call local ancestry, we merged the MEC-NH samples with the above 1000  
491 Genomes reference individuals, and rephased the merged dataset using EAGLE2 (v  
492 2.4.1). Next, we combined the 178 MEC-NH reference with the above 1KGP reference  
493 individuals to form the reference panel. Using this reference panel, we then inferred local

494 ancestry used RFMix [34] (version 2.03-r0). One key parameter for RFMix is the local  
495 recombination rates, which vary across continental populations [35,36] but has not been  
496 estimated for Native Hawaiians or Polynesians. However, using multi-way admixed 1KGP  
497 American (AMR) populations, we evaluated the impact of misspecification of a  
498 recombination map. We found that RFMix inferences of local ancestry are robust even  
499 using a constant recombination map (>98% concordance, **S21 Table**). Therefore we used  
500 HapMap2 pooled recombination map ([ftp://ftp-  
501 trace.ncbi.nih.gov/1000genomes/ftp/technical/working/20110106\\_recombination\\_hotspo  
502 ts/](ftp://ftp-trace.ncbi.nih.gov/1000genomes/ftp/technical/working/20110106_recombination_hotspots/)) to infer local ancestry in Native Hawaiians. To obtain global ancestry estimates, we  
503 summed the local ancestry estimates across the genome, after excluding tracts that have  
504 any ancestral probability < 0.9. We observed that on average, a self-reported Native  
505 Hawaiian individual derived ~29.6% ancestry from EUR, ~29.0% ancestry from EAS, ~1.2%  
506 ancestry from AFR, and the remaining ~40.2% ancestry from PNS. These values are  
507 similar to previous estimates of proportions of genetic ancestry from MEC using ancestry  
508 informative markers [37]. The summed PNS ancestry from RFMix is highly concordant  
509 with that inferred from ADMIXTURE [24], and is thus used for phenotype association and  
510 covariate adjustments in admixture mapping (below).

511

512 ***Phenotype transformation.*** We focused on three categories of traits for which the Native  
513 Hawaiians exhibit excess risk in past epidemiological studies [2–4,6–9]: (1) adiposity traits,  
514 which include BMI at baseline and obesity; (2) metabolic traits, which include fasting  
515 glucose level, fasting insulin level, and Type-2 diabetes (T2D); and (3) cardiovascular  
516 traits, which include HDL, LDL, triglycerides (TG), total cholesterol (TC), heart failure (HF),

517 hyperlipidemia (HYPERL), hypertension (HYPERT), ischemic heart disease (IHD), and  
518 stroke and transient ischemic attacks (TIA). Fasting glucose and insulin levels were  
519 collected after entry to the MEC, between 2001-2006. Obesity, T2D, HF, HYPERL,  
520 HYPERT, IHD, and TIA are binary disease outcomes. The metabolic and the quantitative  
521 cardiovascular traits were previously studied by PAGE consortium; we thus followed the  
522 inclusion criteria and phenotype transformation (based on medication use) as previously  
523 suggested by PAGE [32] (**S22 Table**). At a given BMI, Polynesians have a higher  
524 proportion of lean muscle mass to fat mass than Europeans so we use the recommended  
525 BMI cut-off of 32 kg/m<sup>2</sup> to define obesity cases and controls [25,38]. T2D includes  
526 prevalent cases at cohort entry and incident cases during follow-up, based on self-report  
527 with medication use in questionnaires or a report from linkage to Hawai'i insurers, CMS,  
528 or CHDD [32]. For incident binary cardiovascular traits we utilized the Medicare fee-for-  
529 service linkage data for MEC [39] defined as  
530 <https://www2.ccwdata.org/web/guest/condition-categories>. Descriptive summaries of the  
531 traits and covariates can be found in **S23 Table**.

532  
533 ***Associations between binary and quantitative traits with global ancestries.*** We  
534 tested the association of global Polynesian ancestry with quantitative and binary traits  
535 using linear and logistic regressions, respectively. We focused on the 3428 unrelated  
536 individuals after removing first degree relatives determined by KING [40] and individuals  
537 used in the internal PNS reference panel. To account for the impact of non-genetic factors  
538 that can confound the association between traits and genetic ancestry, covariate-adjusted  
539 outcomes were create by regressing out the impact of the non-genetic factors. These

540 include behavioral traits such as smoking and education, as proxies for socioeconomic  
541 status. For quantitative traits, we first conducted univariate regression of the trait of  
542 interest on the non-genetic covariates. We then retained age and sex in the model, as  
543 well as all covariates that are nominally significantly associated with the trait. For  
544 categorical covariates retained in this procedure, we grouped the non-significantly  
545 associated level to reduce the variable down to a ternary or binary variable. We then  
546 model the covariates jointly in a multivariate regression model, and then standardized the  
547 residuals from this model. The standardized residuals were then used in a multivariate  
548 regression model with estimated global Polynesian, East Asian and African ancestries as  
549 independent variables, leaving European as the reference. For binary traits, we  
550 maintained the same structure, first removing uncorrelated covariates based on univariate  
551 logistic regression models. The remaining covariates are then used in a multivariate  
552 logistic regression with the addition of global ancestry estimates. The coefficients and p-  
553 values associated with the non-genetic covariates and global ancestries from the  
554 multivariate regression model are provided in **S1-15 Tables**.

555  
556 ***Adjusting for neighborhood socioeconomic status (nSES) measures.*** To further  
557 assess if the association between global ancestry and outcome could be explained by  
558 uncaptured non-genetic factors, we included the nSES variable in our regression models  
559 [22]. We determined nSES by subjects' residential census tract using an index derived  
560 from principal components of indicator variables of SES (education level; proportion  
561 unemployed and with blue collar job; proportion <200% poverty line; proportion employed;  
562 median household income, rent and home value) based on 1990 Hawaii Census data.

563 Each Native Hawaiian geocoded baseline address (1993-1996) was assigned a nSES  
564 quintile based on the distribution of neighborhood SES across all census tracts in Hawaii.  
565 For traits that showed strong association in **Table 1** (*i.e.* BMI/obesity, HDL, T2D, and HF),  
566 we added nSES in the model to account for confounding in the assessment of the  
567 association with global ancestry. Because of the area-based design, Native Hawaiian  
568 participants residing in the same census tract were assigned the same nSES measure.  
569 We thus used a mixed effect model to account for this spatial clustering by including the  
570 census tract ID as random effect. We used *lmer* and *glmer* (version 1.1-21) function in R  
571 (version 3.6.2) with default parameters.

572  
573 ***Mapping of binary and quantitative traits using local Polynesian ancestry.*** To  
574 identify local genomic segments in which the Polynesian ancestry is associated with a  
575 trait of interest, we conducted admixture mapping using logistic or linear regression. We  
576 focused on the same 3428 unrelated individuals used in global ancestry analysis (above).  
577 We used linear or logistic regression to test the association of estimated dosage of  
578 Polynesian ancestry from RFMix at each genomic location, while controlling for estimated  
579 global ancestry from EUR, EAS, and AFR. Traits were modeled in the same way as above  
580 in the global ancestry analysis, except we focused only on individual-level covariates for  
581 computational efficiency of genome-wide testing.

582 We determined the significance threshold for admixture mapping for a given trait  
583 using two approaches: by a recently published simulation-based approach [41] and by  
584 permutation. For the simulation-based approach, because we were only interested in  
585 testing the association of Polynesian ancestry to a trait of interest, we dichotomized

586 estimated local ancestry into Polynesian and non-Polynesian segments to estimate the  
587 covariance in local ancestry across the genome. We then estimated the genome-wide  
588 significance threshold in admixture mapping to be  $2.28 \times 10^{-5}$  using 10,000 simulations in  
589 STEAM [41]. For permutation-based approach, we simulated 1,000 runs of genome-wide  
590 admixture mapping, each based on a random phenotype drawn from a standard normal  
591 distribution. We then examined the distribution of the most significantly associated p-  
592 value from each of the simulations and set at the 5% false discovery level to the threshold  
593 of  $2.24 \times 10^{-5}$ . The two thresholds are nearly identical, and are similar to previously  
594 suggested threshold among Latinos [42] ( $4.8 \times 10^{-5}$ ). We thus used  $2.2 \times 10^{-5}$  as the  
595 genome-wide significance threshold for admixture mapping, and also considered regions  
596 with local ancestry association p-values between  $1 \times 10^{-4}$  and  $2.2 \times 10^{-5}$  as suggestive and  
597 report these findings.

598  
599 ***Conditional analysis and single variant tests in associated admixture region.*** For  
600 the locus we identified through local ancestry association (**Table 4**), we defined the signal  
601 region as contiguous variants with admixture *P*-values lower than the genome-wide  
602 significance threshold ( $2.2 \times 10^{-5}$ , or  $-\log_{10}P > 4.64$ ). We then defined a broad region by  
603 extending the signal region to nearby flanking regions that are (1)  $< 5$ Mbp away upstream  
604 or downstream from the signal region, and (2) with  $-\log_{10}P > 4$ . We then imputed our  
605 rephased dataset using Sanger Imputation Service (<https://imputation.sanger.ac.uk/>). We  
606 used 1KGP as the reference panel, and PBWT as the imputation software. We  
607 subsequently filtered out indels and loci with low imputation quality (INFO score  $< 0.4$ ),  
608 and applied a minor allele frequency filter of 1%. We then investigated whether a

609 previously known variant from the GWAS catalog [43] for the same trait could drive this  
610 signal by including all GWAS catalog variants residing in the broad region and passed  
611 quality control in our study as covariates in a conditional regression analysis.

612 We also conducted single variant association based on imputed dosages in the  
613 entire broad region. We included all 3,940 samples in this analysis, and corrected the  
614 relatedness by using a linear mixed model from EMMAX [44]. The inter-sample  
615 relatedness was calculated from PC-relate [33] so to be freed from possible population  
616 structure. We followed the same covariate model and phenotype transformation as was  
617 done in admixture mapping, except for using the top 10 principal components (PCs) from  
618 PC-air [45] as substitutes for the global ancestry covariates. 1,000 permutations were  
619 carried out to estimate the regional critical values for significance.

620

621 **Replication analysis in Samoans.** We attempted to replicate the association of  
622 rs370140172 and nine other proxies showing the strongest single-variant associations  
623 with a cross-sectional population based study of Samoans recruited from Independent  
624 Samoa in 2010 [38,46]. This study was approved by the institutional review board of  
625 Brown University and the Health Research Committee of the Samoa Ministry of Health.  
626 All participants gave written informed consent via consent forms in Samoan language.

627 The Samoan participants from 2010 were genotyped genome-wide with Affymetrix  
628 6.0 genotyping arrays [38]. A subset of 1,284 Samoan participants were whole-genome  
629 sequenced as part of the Trans-Omics for Precision Medicine (TOPMed) Program  
630 sponsored by the National Institutes of Health (NIH) National Heart, Lung, and Blood  
631 Institute (NHLBI). The sequences were used to produce a Samoan-specific reference



632 panel for genotype imputation. Genotypes absent from the Affymetrix genotyping array  
633 and present in the reference panel were imputed in the remaining Samoan participants.  
634 T2D case and control exclusion criteria were defined to mirror that used in the MEC-NH  
635 analyses. Specifically, we removed cases who were pregnant, diagnosed with type 1  
636 diabetes, or under 20 years old. We removed controls with fasting glucose greater than  
637 7 mmol/L. This resulted in 475 cases and 2,377 controls. Association testing was  
638 conducted using logistic mixed model regression implemented in lme4qtl [47]. Empirical  
639 kinship as estimated from the genotypes was included as a random effect covariate. Age,  
640 BMI, education (coded as a continuous variable in six levels), and the first ten PCs were  
641 included as fixed effect covariates in the logistic mixed model regression.

642         The Power of the replication analysis was conducted using the Genetic  
643 Association Study power calculator  
644 ([http://csg.sph.umich.edu/abecasis/cats/gas\\_power\\_calculator/](http://csg.sph.umich.edu/abecasis/cats/gas_power_calculator/)), assuming the case  
645 control sample size, estimated frequency of rs370140172, and a prevalence rate of T2D  
646 of 17.1% [46] in Samoans, and a significance threshold of 0.05.

647  
648 ***Test of Natural Selection.*** We calculated the nSL score [48] of derived alleles across all  
649 imputed loci using Selscan [49], after the post imputation quality control. We calculated  
650 nSL among 178 MEC-NH reference individuals who had estimated PNS ancestry > 90%,  
651 and compared the nSL value for rs370140172 (derived allele of 0.24, and INFO score of  
652 0.87) to that of 44,266 variants selected from the genome matched by imputation  
653 uncertainty (INFO score 0.77-0.97) and derived allele frequency (0.23-0.25).

654

655 **Acknowledgements**

656

657 We would like to thank all of the Native Hawaiian participants in the Multiethnic Cohort  
658 that are involved in this study, which was funded through grants from the National Cancer  
659 Institute (U01CA164973, P01CA168530) and National Human Genome Research  
660 Institute (U01HG007397). We would also like to thank University of Hawai'i Cancer  
661 Center's Native Hawaiian Community Advisory Board for reviewing the study proposal  
662 and providing comments to earlier version of this manuscript. Furthermore, we would like  
663 to thank the Samoan participants of the study, local village authorities, and the many  
664 Samoan and other field workers who contributed to the success of the Samoan OLaGA  
665 Study Group. We acknowledge the Samoan Ministry of Health and the Samoa Bureau of  
666 Statistics for their support of this research. Whole genome sequencing (WGS) for the  
667 Trans-Omics in Precision Medicine (TOPMed) program was supported by the National  
668 Heart, Lung and Blood Institute (NHLBI). NHLBI TOPMed: Genome-wide Association  
669 Study of Adiposity in Samoans was funded by NHLBI (R01HL093093 [S.T. McGarvey]  
670 and (R01 HL133040 [R.L.M.]); WGS (phs000972) was performed at the University of  
671 Washington Northwest Genomics Center (HHSN268201100037C) and the New York  
672 Genome Center (HHSN268201500016C). Centralized read mapping and genotype  
673 calling, along with variant quality metrics and filtering were provided by the TOPMed  
674 Informatics Research Center (3R01HL-117626-02S1; contract HHSN268201800002I).  
675 Phenotype harmonization, data management, sample-identity QC, and general study  
676 coordination were provided by the TOPMed Data Coordinating Center (3R01HL-120393-

677 02S1; contract HHSN268201800001I). We gratefully acknowledge the studies and  
678 participants who provided biological samples and data for TOPMed.

679

## 680 **Reference**

- 681 1. Hixson L, Hepler BB, Kim MO. The Native Hawaiian and Other Pacific Islander  
682 Population: 2010. 2010 Census Briefs. United States Census Bureau; 2012.  
683 Available: <https://www.census.gov/prod/cen2010/briefs/c2010br-12.pdf>
- 684 2. Braden KW, Nigg CR. Modifiable Determinants of Obesity in Native Hawaiian and  
685 Pacific Islander Youth. *Hawaii J Med Public Health*. 2016;75: 162–71.
- 686 3. Madan A, Archambeau OG, Milsom VA, Goldman RL, Borckardt JJ, Grubaugh AL,  
687 et al. More than black and white: differences in predictors of obesity among Native  
688 Hawaiian/Pacific Islanders and European Americans. *Obesity (Silver Spring)*.  
689 2012;20: 1325–8. doi:10.1038/oby.2012.15
- 690 4. Maskarinec G, Erber E, Grandinetti A, Verheus M, Oum R, Hopping BN, et al.  
691 Diabetes incidence based on linkages with health plans: the multiethnic cohort.  
692 *Diabetes*. 2009;58: 1732–8. doi:10.2337/db08-1685
- 693 5. Pike MC, Kolonel LN, Henderson BE, Wilkens LR, Hankin JH, Feigelson HS, et al.  
694 Breast cancer in a multiethnic cohort in Hawaii and Los Angeles: risk factor-adjusted  
695 incidence in Japanese equals and in Hawaiians exceeds that in whites. *Cancer*  
696 *Epidemiol Biomarkers Prev*. 2002;11: 795–800.

- 697 6. Singh GK, Lin SC. Dramatic Increases in Obesity and Overweight Prevalence among  
698 Asian Subgroups in the United States, 1992-2011. *ISRN Prev Med.* 2013;2013:  
699 898691. doi:10.5402/2013/898691
- 700 7. Mau MK, Sinclair K, Saito EP, Baumhofer KN, Kaholokula JK. Cardiometabolic  
701 health disparities in native Hawaiians and other Pacific Islanders. *Epidemiol Rev.*  
702 2009;31: 113–129. doi:10.1093/ajerev/mxp004
- 703 8. Tung WC, Barnes M. Heart Diseases Among Native Hawaiians and Pacific Islanders.  
704 *Home Health Care Management and Practice.* 2014;26: 110–113.  
705 doi:10.1177/1084822313516125
- 706 9. Grandinetti A, Chen R, Kaholokula JK, Yano K, Rodriguez BL, Chang HK, et al.  
707 Relationship of blood pressure with degree of Hawaiian ancestry. *Ethn Dis.* 2002;12:  
708 221–8.
- 709 10. Claw KG, Anderson MZ, Begay RL, Tsosie KS, Fox K, Garrison NA, et al. A  
710 framework for enhancing ethical genomic research with Indigenous communities.  
711 *Nat Commun.* 2018;9: 2957. doi:10.1038/s41467-018-05188-3
- 712 11. Popejoy AB, Fullerton SM. Genomics is failing on diversity. *Nature.* 2016;538: 161–  
713 164. doi:10.1038/538161a
- 714 12. Martin AR, Kanai M, Kamatani Y, Okada Y, Neale BM, Daly MJ. Clinical use of  
715 current polygenic risk scores may exacerbate health disparities. *Nat Genet.* 2019;51:  
716 584–591. doi:10.1038/s41588-019-0379-x

- 717 13. Diamond JM. Taiwan's gift to the world. *Nature*. 2000;403: 709–10.  
718 doi:10.1038/35001685
- 719 14. Kim SK, Gignoux CR, Wall JD, Lum-Jones A, Wang H, Haiman CA, et al. Population  
720 genetic structure and origins of Native Hawaiians in the multiethnic cohort study.  
721 *PLoS One*. 2012;7: e47881. doi:10.1371/journal.pone.0047881
- 722 15. Skoglund P, Posth C, Sirak K, Spriggs M, Valentin F, Bedford S, et al. Genomic  
723 insights into the peopling of the Southwest Pacific. *Nature*. 2016;538: 510–513.  
724 doi:10.1038/nature19844
- 725 16. Nordyke EC. *The Peopling of Hawaii*. 2nd ed. University of Hawaii Press; 1989.
- 726 17. Winkler CA, Nelson GW, Smith MW. Admixture mapping comes of age. *Annu Rev*  
727 *Genomics Hum Genet*. 2010;11: 65–89. doi:10.1146/annurev-genom-082509-  
728 141523
- 729 18. Mersha TB. Mapping asthma-associated variants in admixed populations. *Front*  
730 *Genet*. 2015;6: 292. doi:10.3389/fgene.2015.00292
- 731 19. Shriner D. Overview of Admixture Mapping. *Curr Protoc Hum Genet*. 2017;94:  
732 1.23.1-1.23.8. doi:10.1002/cphg.44
- 733 20. Kolonel LN, Henderson BE, Hankin JH, Nomura AM, Wilkens LR, Pike MC, et al. A  
734 multiethnic cohort in Hawaii and Los Angeles: baseline characteristics. *Am J*  
735 *Epidemiol*. 2000;151: 346–57. doi:10.1093/oxfordjournals.aje.a010213

- 736 21. Wojcik GL, Fuchsberger C, Taliun D, Welch R, Martin AR, Shringarpure S, et al.  
737 Imputation-Aware Tag SNP Selection To Improve Power for Large-Scale, Multi-  
738 ethnic Association Studies. *G3 (Bethesda)*. 2018. doi:10.1534/g3.118.200502
- 739 22. Conroy SM, Shariff-Marco S, Yang J, Hertz A, Cockburn M, Shvetsov YB, et al.  
740 Characterizing the neighborhood obesogenic environment in the Multiethnic Cohort:  
741 a multi-level infrastructure for cancer health disparities research. *Cancer Causes*  
742 *Control*. 2018;29: 167–183. doi:10.1007/s10552-017-0980-1
- 743 23. Lim U, Monroe KR, Buchthal S, Fan B, Cheng I, Kristal BS, et al. Propensity for Intra-  
744 abdominal and Hepatic Adiposity Varies Among Ethnic Groups. *Gastroenterology*.  
745 2019;156: 966-975.e10. doi:10.1053/j.gastro.2018.11.021
- 746 24. Lin M, Caberto C, Wan P, Li Y, Lum-Jones A, Tiirikainen M, et al. Population specific  
747 reference panels are crucial for the genetic analyses of Native Hawaiians: an  
748 example of the CREBRF locus. *bioRxiv*. 2019; 789073. doi:10.1101/789073
- 749 25. Swinburn BA, Ley SJ, Carmichael HE, Plank LD. Body size and composition in  
750 Polynesians. *Int J Obes Relat Metab Disord*. 1999;23: 1178–1183.  
751 doi:10.1038/sj.ijo.0801053
- 752 26. Gastaldelli A, Miyazaki Y, Pettiti M, Matsuda M, Mahankali S, Santini E, et al.  
753 Metabolic effects of visceral fat accumulation in type 2 diabetes. *J Clin Endocrinol*  
754 *Metab*. 2002;87: 5098–5103. doi:10.1210/jc.2002-020696

- 755 27. Neeland IJ, Turer AT, Ayers CR, Powell-Wiley TM, Vega GL, Farzaneh-Far R, et al.  
756 Dysfunctional adiposity and the risk of prediabetes and type 2 diabetes in obese  
757 adults. *JAMA*. 2012;308: 1150–1159. doi:10.1001/2012.jama.11132
- 758 28. Abd El-Aziz MM, Barragan I, O’Driscoll CA, Goodstadt L, Prigmore E, Borrego S, et  
759 al. EYS, encoding an ortholog of *Drosophila* spacemaker, is mutated in autosomal  
760 recessive retinitis pigmentosa. *Nat Genet*. 2008;40: 1285–1287. doi:10.1038/ng.241
- 761 29. Littink KW, van den Born LI, Koenekoop RK, Collin RWJ, Zonneveld MN, Blokland  
762 EAW, et al. Mutations in the EYS gene account for approximately 5% of autosomal  
763 recessive retinitis pigmentosa and cause a fairly homogeneous phenotype.  
764 *Ophthalmology*. 2010;117: 2026–2033, 2033.e1–7.  
765 doi:10.1016/j.ophtha.2010.01.040
- 766 30. Scott RA, Scott LJ, Mägi R, Marullo L, Gaulton KJ, Kaakinen M, et al. An Expanded  
767 Genome-Wide Association Study of Type 2 Diabetes in Europeans. *Diabetes*.  
768 2017;66: 2888–2902. doi:10.2337/db16-1253
- 769 31. Akiyama M, Okada Y, Kanai M, Takahashi A, Momozawa Y, Ikeda M, et al. Genome-  
770 wide association study identifies 112 new loci for body mass index in the Japanese  
771 population. *Nat Genet*. 2017;49: 1458–1467. doi:10.1038/ng.3951
- 772 32. Wojcik GL, Graff M, Nishimura KK, Tao R, Haessler J, Gignoux CR, et al. Genetic  
773 analyses of diverse populations improves discovery for complex traits. *Nature*.  
774 2019;570: 514–518. doi:10.1038/s41586-019-1310-4

- 775 33. Conomos MP, Reiner AP, Weir BS, Thornton TA. Model-free Estimation of Recent  
776 Genetic Relatedness. *Am J Hum Genet.* 2016;98: 127–48.  
777 doi:10.1016/j.ajhg.2015.11.022
- 778 34. Maples BK, Gravel S, Kenny EE, Bustamante CD. RFMix: a discriminative modeling  
779 approach for rapid and robust local-ancestry inference. *Am J Hum Genet.* 2013;93:  
780 278–88. doi:10.1016/j.ajhg.2013.06.020
- 781 35. Wegmann D, Kessner DE, Veeramah KR, Mathias RA, Nicolae DL, Yanek LR, et al.  
782 Recombination rates in admixed individuals identified by ancestry-based inference.  
783 *Nat Genet.* 2011;43: 847–853. doi:10.1038/ng.894
- 784 36. Hinch AG, Tandon A, Patterson N, Song Y, Rohland N, Palmer CD, et al. The  
785 landscape of recombination in African Americans. *Nature.* 2011;476: 170–175.  
786 doi:10.1038/nature10336
- 787 37. Wang H, Haiman CA, Kolonel LN, Henderson BE, Wilkens LR, Le Marchand L, et al.  
788 Self-reported ethnicity, genetic structure and the impact of population stratification in  
789 a multiethnic study. *Hum Genet.* 2010;128: 165–77. doi:10.1007/s00439-010-0841-  
790 4
- 791 38. Minster RL, Hawley NL, Su CT, Sun G, Kershaw EE, Cheng H, et al. A thrifty variant  
792 in CREBRF strongly influences body mass index in Samoans. *Nat Genet.* 2016;48:  
793 1049–1054. doi:10.1038/ng.3620
- 794 39. Setiawan VW, Virnig BA, Porcel J, Henderson BE, Le Marchand L, Wilkens LR, et  
795 al. Linking data from the Multiethnic Cohort Study to Medicare data: linkage results



- 796 and application to chronic disease research. *Am J Epidemiol.* 2015;181: 917–919.  
797 doi:10.1093/aje/kwv055
- 798 40. Manichaikul A, Mychaleckyj JC, Rich SS, Daly K, Sale M, Chen WM. Robust  
799 relationship inference in genome-wide association studies. *Bioinformatics.* 2010;26:  
800 2867–73. doi:10.1093/bioinformatics/btq559
- 801 41. Grinde KE, Brown LA, Reiner AP, Thornton TA, Browning SR. Genome-wide  
802 Significance Thresholds for Admixture Mapping Studies. *Am J Hum Genet.* 2019;104:  
803 454–465. doi:10.1016/j.ajhg.2019.01.008
- 804 42. Pino-Yanes M, Gignoux CR, Galanter JM, Levin AM, Campbell CD, Eng C, et al.  
805 Genome-wide association study and admixture mapping reveal new loci associated  
806 with total IgE levels in Latinos. *J Allergy Clin Immunol.* 2015;135: 1502–1510.  
807 doi:10.1016/j.jaci.2014.10.033
- 808 43. Buniello A, MacArthur JAL, Cerezo M, Harris LW, Hayhurst J, Malangone C, et al.  
809 The NHGRI-EBI GWAS Catalog of published genome-wide association studies,  
810 targeted arrays and summary statistics 2019. *Nucleic Acids Res.* 2019;47: D1005–  
811 D1012. doi:10.1093/nar/gky1120
- 812 44. Kang HM, Sul JH, Service SK, Zaitlen NA, Kong SY, Freimer NB, et al. Variance  
813 component model to account for sample structure in genome-wide association  
814 studies. *Nat Genet.* 2010;42: 348–54. doi:10.1038/ng.548

- 815 45. Conomos MP, Miller MB, Thornton TA. Robust inference of population structure for  
816 ancestry prediction and correction of stratification in the presence of relatedness.  
817 *Genet Epidemiol.* 2015;39: 276–293. doi:10.1002/gepi.21896
- 818 46. Hawley NL, Minster RL, Weeks DE, Viali S, Reupena MS, Sun G, et al. Prevalence  
819 of adiposity and associated cardiometabolic risk factors in the Samoan genome-wide  
820 association study. *Am J Hum Biol.* 2014;26: 491–501. doi:10.1002/ajhb.22553
- 821 47. Ziyatdinov A, Vázquez-Santiago M, Brunel H, Martinez-Perez A, Aschard H, Soria  
822 JM. lme4qtl: linear mixed models with flexible covariance structure for genetic  
823 studies of related individuals. *BMC Bioinformatics.* 2018;19: 68. doi:10.1186/s12859-  
824 018-2057-x
- 825 48. Ferrer-Admetlla A, Liang M, Korneliussen T, Nielsen R. On detecting incomplete soft  
826 or hard selective sweeps using haplotype structure. *Mol Biol Evol.* 2014;31: 1275–  
827 1291. doi:10.1093/molbev/msu077
- 828 49. Szpiech ZA, Hernandez RD. selscan: an efficient multithreaded program to perform  
829 EHH-based scans for positive selection. *Mol Biol Evol.* 2014;31: 2824–2827.  
830 doi:10.1093/molbev/msu211

831

## 832 **Supporting Information**

833 **S1 Fig: Correlation of effect sizes attributed to PNS ancestry in the regression model with**  
834 **or without adjustment for BMI.** Across the binary traits tested, even if the effect attributable to  
835 PNS ancestry is not significant, the effect sizes are lowered if accounting for BMI, suggesting at  
836 least part of the excess risk for these traits among Native Hawaiians are mediated through higher

837 BMI associated with the ancestry. Hyperlipidemia was excluded because BMI is not associated  
838 with the disease risk in univariate regression model. HF, heart failure; HYPERT, hypertension;  
839 IHD, ischemic heart disease; T2D, type-2 diabetes; TIA, stroke and transient ischemic attack.

840 **S2 Fig: Admixture mapping P-value with or without conditioning on variants previously**  
841 **reported in GWAS catalog to be associated with T2D (rs79976124 and rs10498828).** Green  
842 and blue colors denote SNP level P-value in association testing with and without, respectively,  
843 conditioning on known GWAS variants.

844 **S3 Fig: Admixture mapping P-value after conditioning on the most strongly associated**  
845 **variant in single variant analysis in chr6 (T2D) broad region.** The originally reported admixture  
846 signal (blue) can be explained by the conditioned variant (green), suggesting that these single  
847 variants might be novel variants associated with these traits.

848 **S4 Fig: Power of replicating the top signal from single variant analysis with T2D in**  
849 **Samoans.** We estimated the power to replicate the top signal (rs370140172) from single variant  
850 analysis with T2D in the Samoan cohort, using GAS power calculator  
851 ([http://csg.sph.umich.edu/abecasis/cats/gas\\_power\\_calculator/index.html](http://csg.sph.umich.edu/abecasis/cats/gas_power_calculator/index.html)). The prevalence rate  
852 of T2D in Samoans set as 17.1%, which was the value averaged over the reported values in both  
853 sex. The number of cases (N=475) and controls (N=2377) were set to the observed sample size  
854 in Samoans. The genotype relative risk was set to estimated OR (1.096) from MEC-NH.

855 **S5 Fig: Global ancestry proportion estimated from unsupervised ADMIXTURE analysis,**  
856 **after integrating runs of relatedness and unrelatedness.** 3,465 MEC Japanese (MEC-JA), 30  
857 MEC Latinos (MEC-LA), 5,325 MEC African Americans (MEC-AA), and 3,940 MEC Native  
858 Hawaiians (MEC-NH) were merged with the 1000 Genomes Project populations. At K = 4 we  
859 identified an ancestral component (colored red) that are found largely in Native Hawaiians,  
860 presumed to be the Polynesian ancestry.

861 **S1 Table: Details of the association statistics of the covariates and global ancestries of**  
862 **BMI.** Model 1 models the non-genetic covariates according to the heuristic described in the

863 **Methods.** The residual from model 1 is then inverse normalized and tested in model 2. Models  
864 1A and 2A repeats the procedure but included quintiles of nSES levels in a mixed effect model  
865 (**Method**); in this case, the  $R^2$  in Model 1A reported include both the fixed and the random effect.  
866 \* edu4 was a binary variable created from the original categorical variable of education status by  
867 grouping levels 1,2,3 and coded 0, while education status level 4 was coded as 1. This was done  
868 because there were no significant associations between education levels 1 through 3 and BMI.  
869 See Supplemental Table 21 for description of these education levels.

870 **S2 Table: Details of the association statistics of the covariates and global ancestries of**  
871 **WHR.** Model 1 models the non-genetic covariates according to the heuristic described in the  
872 **Methods.** The residual from model 1 is then inverse normalized and tested in model 2. The top  
873 panels were conducted in males only; the bottom in females only. See Supplemental Table 21 for  
874 description of these education and cigarette smoking levels.

875 **S3 Table: Details of the association statistics of the covariates and global ancestries of**  
876 **fasting glucose.** Model 1 models the non-genetic covariates according to the heuristic described  
877 in the **Methods.** The residual from model 1 is then inverse normalized and tested in model 2.

878 **S4 Table: Details of the association statistics of the covariates and global ancestries of**  
879 **fasting insulin.** Model 1 models the non-genetic covariates according to the heuristic described  
880 in the **Methods.** The residual from model 1 is then inverse normalized and tested in model 2.

881 **S5 Table: Details of the association statistics of the covariates and global ancestries of**  
882 **HDL.** Model 1 models the non-genetic covariates according to the heuristic described in the  
883 **Methods.** The residual from model 1 is then inverse normalized and tested in model 2. Models 1A  
884 and 2A repeats the procedure but included quintiles of nSES levels in a mixed effect model  
885 (**Method**); in this case, the  $R^2$  in Model 1A reported include both the fixed and the random effect.

886 **S6 Table: Details of the association statistics of the covariates and global ancestries of**  
887 **LDL.** Model 1 models the non-genetic covariates according to the heuristic described in the  
888 **Methods.** The residual from model 1 is then inverse normalized and tested in model 2.

889 **S7 Table: Details of the association statistics of the covariates and global ancestries of TG.**

890 Model 1 models the non-genetic covariates according to the heuristic described in the Methods.  
891 The residual from model 1 is then inverse normalized and tested in model 2. \* edu4 was a binary  
892 variable created from the original categorical variable of education status by grouping levels 1,2,3  
893 and coded 0, while education status level 4 was coded as 1. This was done because there were  
894 no significant associations between education levels 1 through 3 and BMI.

895 **S8 Table: Details of the association statistics of the covariates and global ancestries of**  
896 **total cholesterol.** Model 1 models the non-genetic covariates according to the heuristic described  
897 in the **Methods**. The residual from model 1 is then inverse normalized and tested in model 2.

898 **S9 Table: Details of the association statistics of the covariates and global ancestries of**  
899 **obesity.** Model 1 models the non-genetic covariates according to the heuristic described in the  
900 Methods. Model 2 then includes global ancestries in addition to the significant covariates. \* edu4  
901 was a binary variable created from the original categorical variable of education status by  
902 grouping levels 1,2,3 and coded 0, while education status level 4 was coded as 1. This was done  
903 because there were no significant associations between education levels 1 through 3 and obesity.  
904 Model 3 included quintiles of nSES levels in a mixed effect model.

905 **S10 Table: Details of the association statistics of the covariates and global ancestries of**  
906 **Type-2 Diabetes.** Model 1 models the non-genetic covariates according to the heuristic described  
907 in the **Methods**. Model 2 then includes global ancestries in addition to the significant covariates.  
908 Model 3 included quintiles of nSES levels in a mixed effect model. \* edu3 was a ternary variable  
909 created from the original categorical variable of education status by grouping levels 1 and 2. This  
910 was done because there were no significant associations between education levels 1 and 2 with  
911 T2D.

912 **S11 Table: Details of the association statistics of the covariates and global ancestries of**  
913 **heart failure.** Model 1 models the non-genetic covariates according to the heuristic described in  
914 the Methods. Model 2 then includes global ancestries in addition to the significant covariates.

915 Model 3 included quintiles of nSES levels in a mixed effect model. \* edu3 was a ternary variable  
916 created from the original categorical variable of education status by grouping levels 1 and 2. This  
917 was done because there were no significant associations between education levels 1 and 2 with  
918 heart failure.

919 **S12 Table: Details of the association statistics of the covariates and global ancestries of**  
920 **hyperlipidemia.** Model 1 models the non-genetic covariates according to the heuristic described  
921 in the Methods. Model 2 then includes global ancestries in addition to the significant covariates. \*  
922 edu4 was a binary variable created from the original categorical variable of education status by  
923 grouping levels 1,2,3 and coded 0, while education status level 4 was coded as 1. This was done  
924 because there were no significant associations between education levels 1 through 3 and  
925 hyperlipidemia.

926 **S13 Table: Details of the association statistics of the covariates and global ancestries of**  
927 **hypertension.** Model 1 models the non-genetic covariates according to the heuristic described  
928 in the **Methods**. Model 2 then includes global ancestries in addition to the significant covariates.

929 **S14 Table: Details of the association statistics of the covariates and global ancestries for**  
930 **ischemic heart disease.** Model 1 models the non-genetic covariates according to the heuristic  
931 described in the Methods. Model 2 then includes global ancestries in addition to the significant  
932 covariates. \* edu3 was a ternary variable created from the original categorical variable of  
933 education status by grouping levels 1 and 2. This was done because there were no significant  
934 associations between education levels 1 and 2 with ischemic heart disease.

935 **S15 Table: Details of the association statistics of the covariates and global ancestries for**  
936 **stroke and transient ischemic attacks.** Model 1 models the non-genetic covariates according  
937 to the heuristic described in the **Methods**. Model 2 then includes global ancestries in addition to  
938 the significant covariates.

939 **S16 Table: Stratified analysis of association between global genetic ancestry and BMI**  
940 **among T2D cases and controls.** Model testing was performed in the same manner as the global

941 analysis with BMI (**S1 Table**), except for stratifying based on T2D disease status. Model column  
942 provided the final model with association coefficients. \* edu4 was a binary variable created from  
943 the original categorical variable of education status by grouping levels 1,2,3 and coded 0, while  
944 education status level 4 was coded as 1. This was done because there were no significant  
945 associations between education levels 1 through 3 and BMI.

946 **S17 Table: Model of association between global ancestry and BMI, including interaction**  
947 **with type-2 diabetes.** Model 1 models the non-genetic covariates according to the heuristic  
948 described in the Methods, except for type-2 diabetes status. The residual from model 1 was then  
949 inverse normalized and tested in model 2, which includes global ancestries, type-2 diabetes status,  
950 and interactions between global ancestries and type-2 diabetes status. \* edu4 was a binary  
951 variable created from the original categorical variable of education status by grouping levels 1,2,3  
952 and coded 0, while education status level 4 was coded as 1. This was done because there were  
953 no significant associations between education levels 1 through 3 and BMI.

954 **S18 Table: Variants within the admixture signal region that were reported to be associated**  
955 **with the tested or related traits in GWAS catalog.** Reported P-value, associated trait, and  
956 mapped genes were provided by the GWAS catalog. Allele frequencies were either calculated  
957 from the imputed data of the 178 reference MEC Native Hawaiian individuals with estimated PNS  
958 ancestry > 90%, or obtained from 1000 Genomes Project. Frequencies were reported with respect  
959 to the minor allele in the Native Hawaiians, given in parenthesis next to the Native Hawaiian  
960 frequency estimates.

961 **S19 Table: Allele frequencies across populations for the most strongly associated variant**  
962 **in chr6 for T2D in single variant association test.** Allele frequencies were either calculated  
963 from the imputed data of the 178 reference MEC Native Hawaiian individuals with estimated PNS  
964 ancestry > 90%, or obtained from 1000 Genomes Project (reported on dbSNP:

965 <https://www.ncbi.nlm.nih.gov/snp/>). Frequencies were reported with respect to the derived  
966 allele, given in parenthesis next to the Native Hawaiian frequency estimates.

967 **S20 Table: Association results to T2D in 2,852 Samoan Replication Cohort.** We attempted  
968 to replicate the association of rs370140172 and nine other proxies showing the strongest single-  
969 variant associations with a cross-sectional population based study of Samoans recruited from  
970 Independent Samoa (**Methods**). EAF, effect allele frequency in Samoans. BETA and SE refers  
971 to the effect size and standard errors, respectively, from the logistic mixed model association tests  
972 in the Samoan cohort. P-val (Samoa) and P-val (MEC-NH) provide the p-value from the logistic  
973 mixed model association tests in the Samoan cohort and MEC Native Hawaiian cohort,  
974 respectively.

975 **S21 Table: Local ancestry inference using RFMix is robust to the choice of recombination**  
976 **map.** To evaluate the impact of recombination map on local ancestry inference, we used the 1000  
977 Genomes AMR population. Following the same procedure used for Native Hawaiians, we  
978 identified through unsupervised ADMIXTURE analysis 49 Peruvian (PEL) and 3 Mexican (MEX)  
979 individuals from 1000 Genomes as having > 80% Native American ancestry. We then inferred  
980 local ancestry using RFMix in 71 HapMap3 MEX individuals using the constructed reference panel  
981 of 99 CEU, 108 YRI, and 52 NA individuals from 1000 Genomes. We used three recombination  
982 map in the local ancestry inference: a HapMap2 pooled recombination map, a mis-specified  
983 African-American map, and a constant map that assumes a constant rate of 1cM / Mb across the  
984 genome. We compared in pairwise fashion the concordance of inferred ancestry across common  
985 variants between runs, and calculated concordance rate as the sum of the diagonal of the  
986 contingency table. Across all comparisons, even when using a constant rate map, the  
987 concordance rate is extremely high (0.987, 0.981, and 0.981 for the comparisons of default vs.  
988 AA map, default to constant rate map, and constant rate to AA map, respectively), suggesting  
989 that the choice of recombination map does not strongly impact the local ancestry inference using  
990 RFMix.



991 **S22 Table: phenotype inclusion and transformation for metabolic and quantitative**  
992 **cardiovascular traits.** These traits were studied in PAGE consortium and we thus follow the  
993 same criteria and transformation.

994 **S23 Table: Descriptive summary statistics of the traits and covariates analyzed.** Summary  
995 statistics reported after exclusion and transformation as described in S20 Table. For biomarkers  
996 (glucose, insulin, HDL, LDL, TG, and TC), a subset of participants were invited after cohort entry.  
997 Thus there is an age at baseline and an age at blood draw.
